# Supplementary material for: Multivariate Analysis of Biochemical Properties Reveals Diversity among Yardlong Beans of Different Origins
Source: MDPI journal article supplement (doi:10.3390/antiox13040463), 2024-04-14
Supplement: s1 [file s1]

## Supplementary material

# Multivariate Analysis of Biochemical Properties Reveals Diversity among Yardlong beans of Different Origins

Yu-Mi Choi <sup>1</sup>, Hyemyeong Yoon <sup>1</sup>, Myoung-Jae Shin <sup>1</sup>, Sukyeung Lee <sup>2</sup>, Jungyoon Yi <sup>1</sup>, Young-ah Jeon <sup>1</sup>, Xiaohan Wang <sup>1</sup> and Kebede Taye Desta <sup>1,\*</sup>

<sup>1</sup> National Agrobiodiversity Center, National Institute of Agricultural Sciences, Rural Development Administration, Jeonju 54874, Republic of Korea.

<sup>2</sup> International Technology Cooperation Center, Technology Cooperation Bureau, Rural Development Administration, Jeonju 54875, Republic of Korea.

\* Correspondence: kebedetdesta@korea.kr (K.T.D)

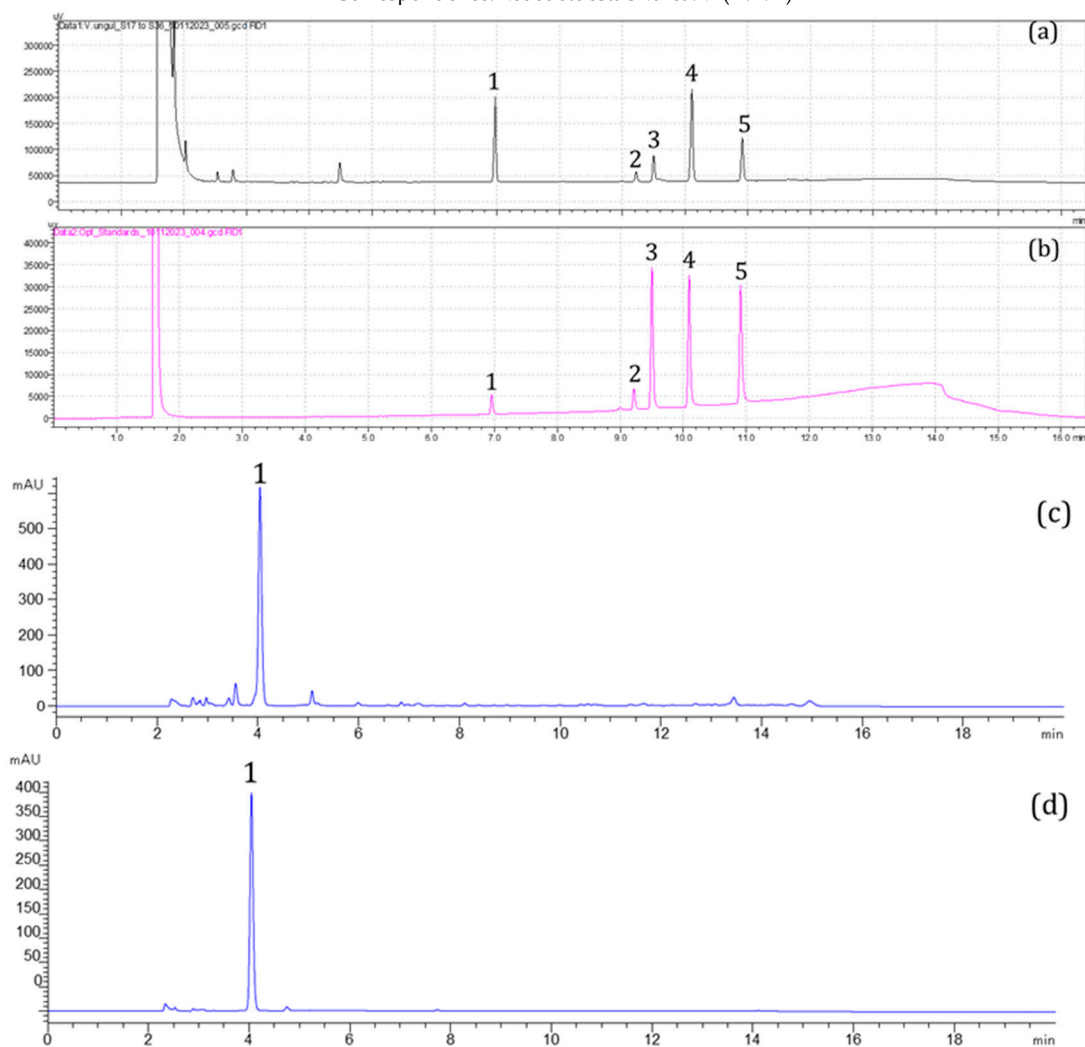

**Figure S1.** GC-chromatograms of a representative sample (a) and fatty acid standards (b), and LC-chromatograms of a representative sample (c) and L-ascorbic acid standard (d). Peak assignments: GC-chromatograms: Palmitic acid (1), Stearic acid (2), Oleic acid (3), Linoleic acid (4), Linolenic acid (5); LC: Chromatograms: Ascorbic acid (1).

**Table S1.** Frequencies and distribution of qualitative agronomical traits across 35 yardlong beans grown in Korea.

| <b>Variable</b> | <b>Categories</b> | <b><i>f</i></b> | <b>Rel. <i>f</i> (%)</b> |
|-----------------|-------------------|-----------------|--------------------------|
| Growth habit    | Indeterminate     | 32              | 91.43                    |
|                 | Determinate       | 3               | 8.57                     |
| Flower color    | Light purple      | 32              | 91.43                    |
|                 | White             | 3               | 8.57                     |
| Pod color       | Pale tan          | 16              | 45.71                    |
|                 | Mixed             | 9               | 25.71                    |
|                 | Dark brown        | 7               | 20.00                    |
|                 | Light brown       | 3               | 8.57                     |
| Pod curvature   | Mixed             | 14              | 40.00                    |
|                 | Coiled            | 18              | 51.43                    |
|                 | Curved            | 1               | 2.86                     |
|                 | Slightly curved   | 2               | 5.71                     |
| Pod pubescence  | No hair           | 35              | 100.00                   |
| Seed shape      | Kidney shaped     | 35              | 100.00                   |
| Seed coat color | Black             | 3               | 8.57                     |
|                 | Brown             | 25              | 71.43                    |
|                 | Other             | 6               | 17.14                    |
|                 | Tan               | 1               | 2.86                     |
| Seed coat lust  | Dull              | 35              | 100.00                   |
| Hilum color     | Eye absent        | 35              | 100.00                   |

**Table S2.** Statistics of quantitative agronomical traits across 35 yardlong beans grown in Korea.

| Name                        | Introduction/temporary<br>Number | Origin   | DF<br>(Days) | DFM<br>(Days) | DM<br>(Days) | PL<br>(cm) | SPP<br>(n) | HSW<br>(g) |
|-----------------------------|----------------------------------|----------|--------------|---------------|--------------|------------|------------|------------|
| San chi lu                  | 217325                           | China    | 48           | 25            | 73           | 71.40 a    | 16.00 a-f  | 18.00 ef   |
| 901 Qingjo jiangdou         | 250133                           | China    | 53           | 19            | 72           | 59.60 b-g  | 14.40 b-i  | 14.37 mn   |
| Qing jiang 2006             | 260948                           | China    | 54           | 18            | 72           | 65.60 ab   | 17.20 a-e  | 14.13 n    |
| Gaotian jinguan             | 302034                           | China    | 54           | 18            | 72           | 61.00 b-f  | 13.80 d-i  | 14.53 m    |
| Gyeonggiyonginsujib         | K035303                          | Korea    | 56           | 21            | 77           | 43.20 lmn  | 16.00 a-f  | 16.63 j    |
| Gangwonpyeongchang-2003-4   | K037279                          | Korea    | 56           | 17            | 73           | 46.40 j-m  | 16.40 a-f  | 17.07 i    |
| Gangwonpyeongchang-2003-17  | K037292                          | Korea    | 57           | 16            | 73           | 42.80 lmn  | 19.00 a    | 17.73 fg   |
| Hang xin taikong wu jia dou | K052084                          | China    | 47           | 24            | 71           | 32.10 op   | 15.00 a-i  | 14.37 mn   |
| Techang 908 jiangdou        | K052086                          | China    | 54           | 18            | 72           | 57.40 c-g  | 17.40 a-d  | 13.13 p    |
| Taiwan chungju hong         | K052109                          | China    | 56           | 28            | 84           | 52.80 g-k  | 15.40 a-h  | 17.63 gh   |
| Techang 902 jiangdou        | K052119                          | China    | 50           | 22            | 72           | 58.20 c-g  | 18.20 abc  | 16.03 k    |
| Tai Htaung Pe Ni            | K127002                          | Myanmar  | 57           | 27            | 84           | 54.40 f-i  | 15.20 a-h  | 18.93 b    |
| THA-JSH-2008-81021          | K146060                          | Thailand | 59           | 29            | 88           | 49.60 h-l  | 15.80 a-g  | 22.23 a    |
| Tanjingeun                  | K161964                          | Korea    | 53           | 21            | 74           | 30.60 p    | 13.00 f-i  | 8.10 s     |
| Jasaekginggori              | K162054                          | Korea    | 57           | 17            | 74           | 47.40 i-m  | 18.00 abc  | 16.27 k    |
| Gatggeungong                | K163690                          | Korea    | 57           | 17            | 74           | 46.00 klm  | 18.00 abc  | 17.37 hi   |
| MMR-JYH-2010-90             | K166990                          | Myanmar  | 59           | 28            | 87           | 59.80 b-g  | 11.60 hi   | 15.27 l    |
| Sung 99                     | K168155                          | Myanmar  | 54           | 15            | 69           | 37.40 no   | 14.40 b-i  | 12.90 pq   |
| Guamian hong jiangdou       | K170009                          | China    | 57           | 22            | 79           | 53.40 g-j  | 14.20 c-i  | 18.13 de   |
| Qiu jiang 512               | K170010                          | China    | 50           | 24            | 74           | 43.20 lmn  | 13.20 e-i  | 19.17 b    |
| Chungbuk Geosan 2011-18     | K171518                          | Korea    | 56           | 18            | 74           | 43.40 lmn  | 12.00 ghi  | 16.13 k    |
| Chungbuk Geosan 2011-245    | K171745                          | Korea    | 56           | 18            | 74           | 42.20 lmn  | 16.20 a-f  | 16.67 j    |
| 901 Zaoshu jiangdou         | K176603                          | China    | 54           | 19            | 73           | 63.80 bcd  | 17.60 a-d  | 14.17 n    |

|                          |         |          |             |             |             |             |             |            |
|--------------------------|---------|----------|-------------|-------------|-------------|-------------|-------------|------------|
| Techang jinqili          | K223095 | China    | 50          | 22          | 72          | 57.40 c-g   | 17.20 a-e   | 13.53 o    |
| Nan 1 Variety            | K243771 | Thailand | 56          | 23          | 79          | 55.20 e-h   | 11.20 i     | 18.47 c    |
| Hei mei 1                | K251318 | China    | 54          | 18          | 72          | 62.00 b-e   | 16.80 a-f   | 14.33 mn   |
| Chunqiu hong jiangdou    | K251346 | China    | 57          | 22          | 79          | 55.40 e-h   | 14.60 b-i   | 18.33 cd   |
| Man di hong wu jia dou   | K251347 | China    | 54          | 17          | 71          | 23.80 q     | 16.20 a-f   | 12.23 r    |
| Tichun zhi jiang28-2     | K251348 | China    | 50          | 21          | 71          | 57.00 d-g   | 16.80 a-f   | 17.27 i    |
| Te xuan zhang tang wang  | K251349 | China    | 54          | 18          | 72          | 57.70 c-g   | 18.40 ab    | 17.77 fg   |
| Hei mei huang zi wang    | K253775 | China    | 50          | 27          | 77          | 64.60 bc    | 18.20 abc   | 13.53 o    |
| Yard long Bean 287/2556  | K253844 | Thailand | 54          | 25          | 79          | 28.60 pq    | 17.00 a-f   | 12.67 q    |
| SD 3135                  | K255113 | Korea    | 59          | 22          | 81          | 42.60 lmn   | 16.20 a-f   | 17.80 fg   |
| KSL 170256               | K267332 | Korea    | 57          | 20          | 77          | 42.00 mn    | 16.20 a-f   | 17.17 i    |
| Gyeongnamhabcheon-2019-2 | K272494 | Korea    | 59          | 23          | 82          | 48.00 i-m   | 15.40 a-h   | 13.07 p    |
| Range (Min- Max)         |         |          | 47.00-59.00 | 15.00-29.00 | 69.00-88.00 | 23.80-71.40 | 11.20-19.00 | 8.10-22.23 |
| Mean                     |         |          | 54.51       | 21.11       | 75.63       | 50.17       | 15.78       | 15.86      |
| CV (%)                   |         |          | 5.76        | 17.78       | 6.32        | 22.21       | 12.38       | 16.50      |

DF: Days to flowering, DFM: Days from flowering to maturity, DM: Days to maturity, HSW: One hundred seeds weight, PL: Pod length, SPP: seeds per pod. Different letters in a column represent significantly different mean values ( $p < 0.05$ ).

**Table S3.** Factor loadings and contribution of variables to the variance observed among the yardlong bean accessions in the principal component analysis

| Variable | PC1   |      | PC2   |       | PC3   |       | PC4   |       | PC5   |       | PC6   |       | PC7   |       |
|----------|-------|------|-------|-------|-------|-------|-------|-------|-------|-------|-------|-------|-------|-------|
|          | FL    | %    | FL    | %     | FL    | %     | FL    | %     | FL    | %     | FL    | %     | FL    | %     |
| DF       | 0.58  | 4.21 | -0.52 | 6.69  | 0.09  | 0.30  | -0.08 | 0.24  | 0.02  | 0.01  | 0.31  | 8.36  | -0.36 | 12.97 |
| DFM      | 0.36  | 1.65 | 0.24  | 1.40  | 0.10  | 0.33  | -0.40 | 6.34  | 0.60  | 17.20 | 0.18  | 2.77  | 0.27  | 7.22  |
| DM       | 0.66  | 5.55 | -0.16 | 0.59  | 0.14  | 0.65  | -0.36 | 5.30  | 0.48  | 11.10 | 0.34  | 10.27 | -0.03 | 0.06  |
| PL       | -0.36 | 1.59 | 0.18  | 0.77  | 0.51  | 8.70  | 0.09  | 0.35  | 0.57  | 15.65 | 0.05  | 0.24  | -0.13 | 1.68  |
| SPP      | -0.32 | 1.28 | 0.15  | 0.53  | 0.32  | 3.57  | 0.24  | 2.35  | -0.37 | 6.59  | 0.33  | 9.65  | 0.04  | 0.19  |
| HSW      | 0.25  | 0.77 | -0.10 | 0.26  | 0.72  | 17.76 | -0.51 | 10.66 | 0.06  | 0.19  | -0.22 | 4.07  | 0.04  | 0.14  |
| TP       | 0.48  | 2.89 | -0.30 | 2.24  | 0.40  | 5.40  | -0.07 | 0.22  | 0.38  | 6.93  | -0.25 | 5.63  | 0.37  | 13.32 |
| TF       | -0.16 | 0.33 | 0.62  | 9.20  | 0.37  | 4.61  | 0.01  | 0.00  | -0.09 | 0.39  | 0.08  | 0.52  | -0.17 | 2.90  |
| CFC      | 0.02  | 0.01 | 0.24  | 1.38  | -0.42 | 5.96  | 0.62  | 15.87 | 0.53  | 13.59 | 0.02  | 0.03  | -0.02 | 0.05  |
| DFC      | 0.25  | 0.79 | 0.15  | 0.57  | -0.24 | 1.88  | 0.60  | 14.71 | 0.16  | 1.29  | -0.09 | 0.66  | 0.54  | 29.42 |
| Vit C    | 0.02  | 0.01 | -0.21 | 1.04  | 0.05  | 0.09  | -0.10 | 0.38  | -0.37 | 6.36  | 0.67  | 39.53 | 0.47  | 21.47 |
| TPC      | 0.63  | 5.04 | 0.66  | 10.71 | -0.07 | 0.17  | 0.05  | 0.12  | -0.08 | 0.27  | 0.16  | 2.26  | 0.03  | 0.07  |
| DPPH     | 0.73  | 6.73 | 0.54  | 7.08  | 0.17  | 0.97  | 0.11  | 0.46  | -0.25 | 3.06  | -0.05 | 0.19  | -0.03 | 0.10  |
| ABTS     | 0.81  | 8.30 | 0.47  | 5.37  | -0.01 | 0.01  | -0.03 | 0.04  | -0.18 | 1.61  | 0.05  | 0.22  | -0.03 | 0.07  |
| RP       | 0.82  | 8.46 | 0.47  | 5.42  | 0.08  | 0.21  | 0.03  | 0.03  | -0.25 | 3.02  | 0.00  | 0.00  | 0.02  | 0.03  |
| TTC      | 0.85  | 9.03 | 0.25  | 1.51  | 0.30  | 3.08  | -0.11 | 0.48  | 0.12  | 0.67  | 0.02  | 0.05  | -0.04 | 0.17  |
| TSC      | 0.75  | 7.06 | 0.36  | 3.09  | 0.01  | 0.01  | 0.09  | 0.31  | -0.19 | 1.64  | -0.29 | 7.27  | 0.08  | 0.71  |
| PA       | 0.64  | 5.22 | -0.64 | 9.97  | 0.21  | 1.43  | 0.17  | 1.18  | -0.21 | 2.15  | -0.12 | 1.23  | 0.03  | 0.10  |
| SA       | -0.49 | 3.03 | 0.01  | 0.00  | 0.33  | 3.61  | 0.61  | 14.91 | 0.30  | 4.36  | 0.25  | 5.56  | -0.11 | 1.12  |
| OA       | -0.79 | 7.87 | 0.50  | 6.01  | 0.26  | 2.29  | -0.17 | 1.16  | -0.04 | 0.10  | -0.04 | 0.12  | 0.10  | 0.92  |
| LA       | 0.82  | 8.42 | 0.17  | 0.67  | -0.22 | 1.71  | 0.24  | 2.29  | 0.19  | 1.70  | 0.09  | 0.78  | -0.22 | 4.90  |
| LLA      | 0.00  | 0.00 | -0.40 | 3.87  | -0.68 | 15.46 | -0.46 | 8.57  | -0.01 | 0.01  | -0.01 | 0.01  | 0.09  | 0.78  |
| TSFA     | 0.48  | 2.91 | -0.66 | 10.61 | 0.34  | 3.87  | 0.41  | 6.77  | -0.10 | 0.52  | -0.03 | 0.06  | -0.01 | 0.01  |
| TUFA     | -0.48 | 2.91 | 0.66  | 10.61 | -0.34 | 3.87  | -0.41 | 6.77  | 0.10  | 0.52  | 0.03  | 0.06  | 0.01  | 0.01  |

|                 |       |      |       |      |       |       |       |      |       |      |       |      |       |      |
|-----------------|-------|------|-------|------|-------|-------|-------|------|-------|------|-------|------|-------|------|
| PUFA            | 0.69  | 5.96 | -0.13 | 0.41 | -0.65 | 14.09 | -0.11 | 0.50 | 0.15  | 1.07 | 0.07  | 0.46 | -0.13 | 1.59 |
| Eigenvalue      | 7.92  |      | 4.12  |      | 2.96  |       | 2.46  |      | 2.10  |      | 1.15  |      | 1.01  |      |
| Variability (%) | 31.66 |      | 16.48 |      | 11.83 |       | 9.85  |      | 8.40  |      | 4.59  |      | 4.03  |      |
| Cumulative (%)  | 31.66 |      | 48.14 |      | 59.97 |       | 69.82 |      | 78.22 |      | 82.81 |      | 86.84 |      |

ABTS: ABTS<sup>•+</sup> scavenging activity, C: Cultivar, CFC: crude fiber content, CHN, China, DF: Days to flowering, DFC: Dietary fiber content, DFM: Days from flowering to maturity, DM: Days to maturity, DPPH: DPPH<sup>•</sup> scavenging activity, HSW: One-hundred seeds weight, KOR: Korea, L: Landrace, LA: Linoleic acid, LLA: Linolenic acid, MMR: Myanmar, OA: Oleic acid, PA: Palmitic acid, PL: Pod length, PUAF: Total polyunsaturated fatty acid, RP: Reducing power, SA: Stearic acid, SPP; number of seeds per pod, TF: Total fat, THA: Thailand, TP: Total protein, TSFA: Total saturated fatty acid, TUFA: Total unsaturated fatty acid, TPC: Total phenolic content, TSC: Total saponin content, TTC: Total tannin content, Vit C: Vitamin C.
